# Supplementary material for: Targeted whole exome sequencing and Drosophila modelling to unveil the molecular basis of primary ovarian insufficiency
Source: PubMed Central journal article supplement — Hum Reprod. 2021 Sep 4;36(11):2975–91. doi: 10.1093/humrep/deab192 (PMC8523209; doi:10.1093/humrep/deab192), 2021-09-04
Supplement: deab192_supplementary_table_s1.pdf [file deab192_supplementary_table_s1.pdf]

**Supplementary Table S1** Clinical data of Italian POI patients.

| Italian sample | Age | Age at recruitment | Diagnosis (PA/SA) | Age at menarche | Age at SA onset | Weight, kg | Height, cm | FSH, IU/l | LH, IU/l | Estradiol, pg/ml | Familial case (yes/no) | Karyotype | FMRI pre-mutation | Array-CGH (yes/no) | Ovary-related CNVs PMID 30689869 |
|----------------|-----|--------------------|-------------------|-----------------|-----------------|------------|------------|-----------|----------|------------------|------------------------|-----------|-------------------|--------------------|----------------------------------|
| IPO101         | NA  | NA                 | PA                | –               | –               | NA         | NA         | NA        | NA       | NA               | NA                     | NA        | NA                | Yes                | FDu STS                          |
| IPO102         | 41  | 32                 | SA                | 13              | 19              | 58         | 160        | 64.9      | 39.7     | 17               | No                     | NA        | Negative          | No                 | –                                |
| IPO103         | 42  | NA                 | SA                | NA              | 19              | NA         | NA         | 62.1      | 34.7     | NA               | No                     | NA        | NA                | No                 | –                                |
| IPO104         | 32  | 23                 | SA                | 11              | 21              | 65         | 164        | 133.4     | 62.3     | 1                | Yes                    | 46,XX     | Negative          | No                 | –                                |
| IPO105         | 28  | 18                 | PA                | –               | –               | 78         | 188        | 102.5     | 30.3     | 27               | No                     | 46,XX     | Negative          | Yes                | FDu SYCE1; PPE TSHZ2             |
| IPO106         | 25  | NA                 | SA                | 11              | 11              | NA         | 156        | 141       | 143      | NA               | Yes                    | 46,XX     | Negative          | No                 | –                                |
| IPO107         | 45  | 34                 | PA                | –               | –               | 62         | 170        | 90        | 45       | 15               | No                     | 46,XX     | NA                | Yes                | PDu MGLL                         |
| IPO108         | 45  | NA                 | SA                | 12              | 19              | NA         | 160        | 83.8      | 52.5     | NA               | No                     | NA        | Negative          | No                 | –                                |
| IPO109         | NA  | NA                 | PA                | –               | –               | NA         | NA         | NA        | NA       | NA               | Yes                    | 46,XX     | Negative          | Yes                | No                               |
| IPO110         | 24  | 15                 | PA                | –               | –               | 37         | 149        | 82        | 28.1     | 18               | No                     | NA        | Negative          | Yes                | FDe SYCE1; FDu MSL3              |
| IPO111         | 27  | 18                 | SA                | 14              | 16              | 60         | 160        | 58.7      | 52.9     | 11               | No                     | 46,XX     | Negative          | No                 | –                                |
| IPO112         | 27  | NA                 | SA                | 11              | 12              | NA         | 149        | 125       | 32.3     | NA               | No                     | 46,XX     | Negative          | No                 | –                                |
| IPO113         | NA  | NA                 | SA                | NA              | 24              | NA         | 160        | 70.5      | 95.11    | NA               | Yes                    | 46,XX     | Negative          | No                 | –                                |
| IPO114         | 25  | 15                 | PA                | –               | –               | 40         | 146        | 96.3      | 26.9     | 18               | Yes                    | 46,XX     | NA                | Yes                | No                               |
| IPO115         | 24  | NA                 | SA                | 11              | 12              | NA         | 140        | 113.6     | 41.4     | NA               | No                     | 46,XX     | Negative          | No                 | –                                |
| IPO116         | 32  | NA                 | SA                | 13              | 16              | NA         | 147        | 82.3      | 22.4     | NA               | No                     | NA        | NA                | No                 | –                                |
| IPO117         | 30  | 20                 | SA                | 12              | 19              | 50         | 155        | 80.5      | 9.01     | 1                | Yes                    | 46,XX     | Negative          | No                 | –                                |
| IPO119         | 41  | NA                 | SA                | 14              | 14              | NA         | 165        | 77.6      | 15.8     | NA               | No                     | 46,XX     | Negative          | No                 | –                                |
| IPO120         | 26  | 16                 | SA                | 12              | 12              | 58         | 154        | 111.2     | 33.1     | 10               | No                     | 46,XX     | Negative          | No                 | –                                |
| IPO121         | 34  | 23                 | PA                | –               | –               | NA         | 164        | 138       | 31       | NA               | No                     | 46,XX     | Negative          | Yes                | No                               |
| IPO122         | 41  | NA                 | PA                | –               | –               | NA         | NA         | 57.8      | 72.8     | NA               | Yes                    | 46,XX     | Negative          | Yes                | FDu ZFR2, EEF2, MAP2K2, SIRT6    |
| IPO123         | NA  | NA                 | SA                | NA              | 18              | NA         | NA         | NA        | NA       | NA               | Yes                    | NA        | NA                | No                 | –                                |
| IPO124         | 49  | NA                 | SA                | NA              | 24              | NA         | 170        | 63.61     | 28.42    | NA               | No                     | 46,XX     | Negative          | No                 | –                                |
| IPO125         | 57  | NA                 | PA                | –               | –               | NA         | 161        | 73        | NA       | NA               | No                     | 46,XX     | Negative          | Yes                | No                               |
| IPO126         | NA  | NA                 | PA                | –               | –               | NA         | NA         | NA        | NA       | NA               | NA                     | NA        | Negative          | Yes                | No                               |
| IPO127         | NA  | NA                 | SA                | 13              | 24              | 52         | 170        | 89.9      | 47.9     | 11               | No                     | 46,XX     | Negative          | No                 | –                                |
| IPO128         | 24  | 16                 | PA                | –               | –               | 51         | 164        | 140.5     | 35.7     | 10               | NA                     | NA        | NA                | Yes                | PDe FZD6; FDu PSMB1, PDu TBP     |
| IPO129         | 41  | NA                 | SA                | 12              | 24              | 47         | 160        | 77        | 40       | 42               | Yes                    | NA        | Negative          | No                 | –                                |
| IPO130         | 26  | 14                 | PA                | –               | –               | 58         | 156        | 84.1      | 29.2     | 7                | No                     | 46,XX     | Negative          | Yes                | No                               |
| IPO133         | NA  | NA                 | PA                | –               | –               | NA         | NA         | NA        | NA       | NA               | NA                     | NA        | Negative          | Yes                | PPE DIAPH2                       |
| IPO134         | 43  | NA                 | SA                | 16              | 18              | NA         | 160        | 108       | 25       | NA               | No                     | 46,XX     | Negative          | No                 | –                                |
| IPO135         | 26  | 17                 | SA                | 15              | 17              | 52         | 165        | 81.7      | 22.1     | 15               | Yes                    | NA        | Negative          | No                 | –                                |
| IPO136         | 40  | NA                 | SA                | 12              | 23              | NA         | 165        | 42.3      | 51       | NA               | NA                     | NA        | Negative          | No                 | –                                |

(continued)

**Supplementary Table S1 Continued**

| Italian sample | Age | Age at recruitment | Diagnosis (PA/SA) | Age at menarche | Age at SA onset | Weight kg | Height cm | FSH, IU/l | LH, IU/l | Estradiol, pg/ml | Familial case (yes/no) | Karyotype | FMRI pre-mutation | Array-CGH (yes/no) | Ovary-related CNVs PMID 30689869                  |
|----------------|-----|--------------------|-------------------|-----------------|-----------------|-----------|-----------|-----------|----------|------------------|------------------------|-----------|-------------------|--------------------|---------------------------------------------------|
| IPO37          | 42  | NA                 | SA                | 14              | 22              | NA        | NA        | 103       | 55       | 15               | Yes                    | 46,XX     | Negative          | No                 | –                                                 |
| IPO39          | 31  | NA                 | SA                | 11              | 11              | 50        | 167       | 123       | 50.3     | 0.05             | No                     | 46,XX     | Negative          | No                 | –                                                 |
| IPO40          | 29  | NA                 | SA                | 9               | 15              | NA        | 155       | 48.4      | 18.7     | NA               | No                     | 46,XX     | Negative          | No                 | –                                                 |
| IPO42          | 30  | 19                 | PA                | –               | –               | 39        | 167       | 135       | 49       | 19               | Yes                    | 46,XX     | NA                | Yes                | PPE GRIA1                                         |
| IPO44          | 44  | NA                 | SA                | 13              | 23              | NA        | 172       | 73.6      | 28.1     | NA               | No                     | NA        | Negative          | No                 | –                                                 |
| IPO45          | NA  | NA                 | PA                | –               | –               | NA        | NA        | 44        | 13       | 20               | Yes                    | 46,XX     | Negative          | Yes                | PPE TSHZ2                                         |
| IPO46          | NA  | NA                 | PA                | –               | –               | NA        | NA        | NA        | NA       | NA               | Yes                    | NA        | Negative          | Yes                | PDu SLMAP; FDe CPEB1, WHAMM, BTBD1, BNCF1, SH3GL3 |
| IPO47          | 41  | NA                 | PA                | –               | –               | NA        | 160       | NA        | NA       | NA               | NA                     | 46,XX     | NA                | Yes                | No                                                |

Array-CGH, array-comparative genomic hybridisation; CNVs, copy number variants; FDe, full deletion; FDu, full duplication; NA, not available; PA, primary amenorrhoea; PDe, partial deletion; PDu, partial duplication; PPE, potential position effect; SA, secondary amenorrhoea.
